# Supplementary material for: Development of a facile rolling method to amplify an analyte's weak SERS activity and its application for chlordane detection
Source: Royal Society of Chemistry journal article supplement (doi:10.1039/c9ay02140j), 2019-12-11
Supplement: c9ay02140j1.pdf [file c9ay02140j1.pdf]

# Supporting Information

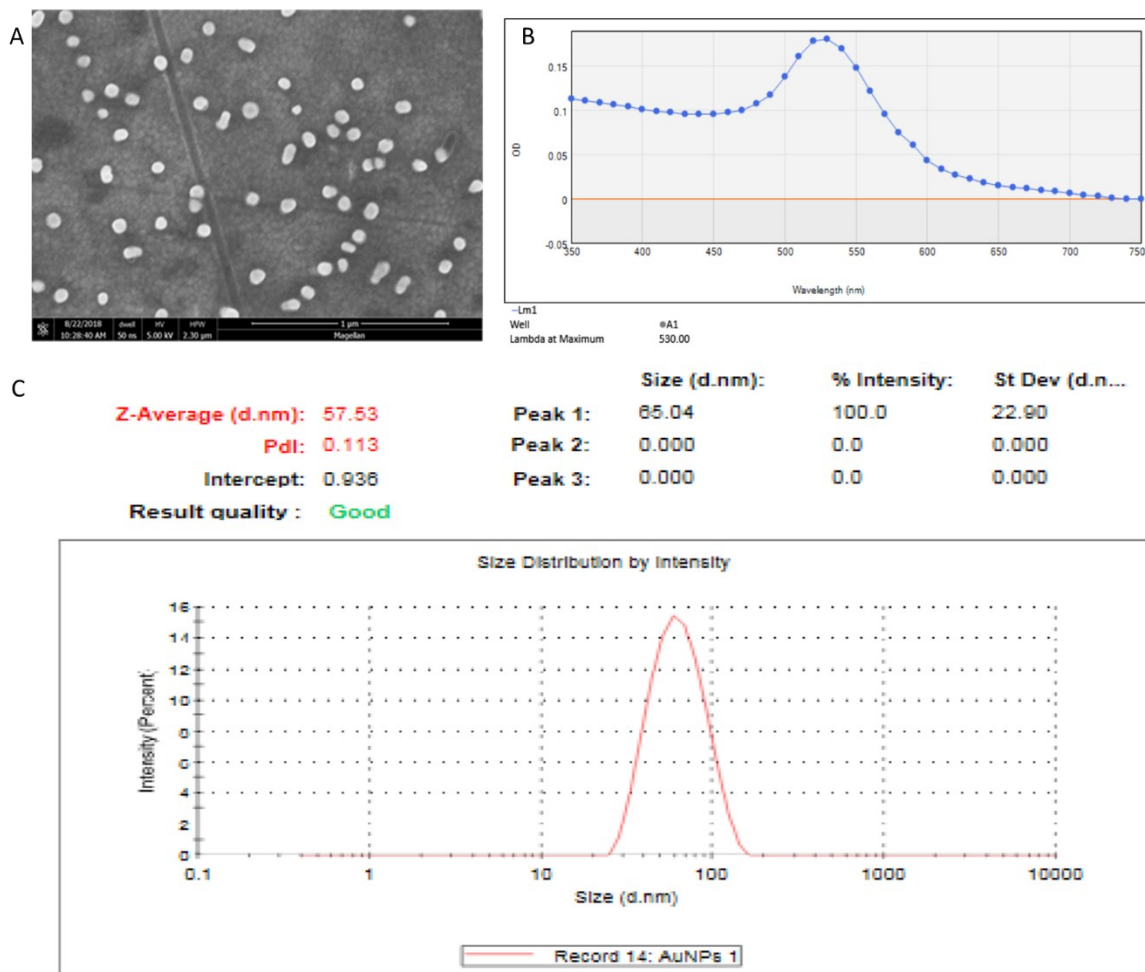

Figure 1. (A) TEM photo of home-made AuNPs, (B) UV-vis spectra of AuNPs, (C) DLS spectra of AuNPs
